# Supplementary material for: Chemical phase segregation during the crystallization of Ge-rich GeSbTe alloys
Source: Royal Society of Chemistry journal article supplement (doi:10.1039/c9tc02302j), 2019-01-01
Supplement: c9tc02302j1.pdf [file c9tc02302j1.pdf]

# Supporting info

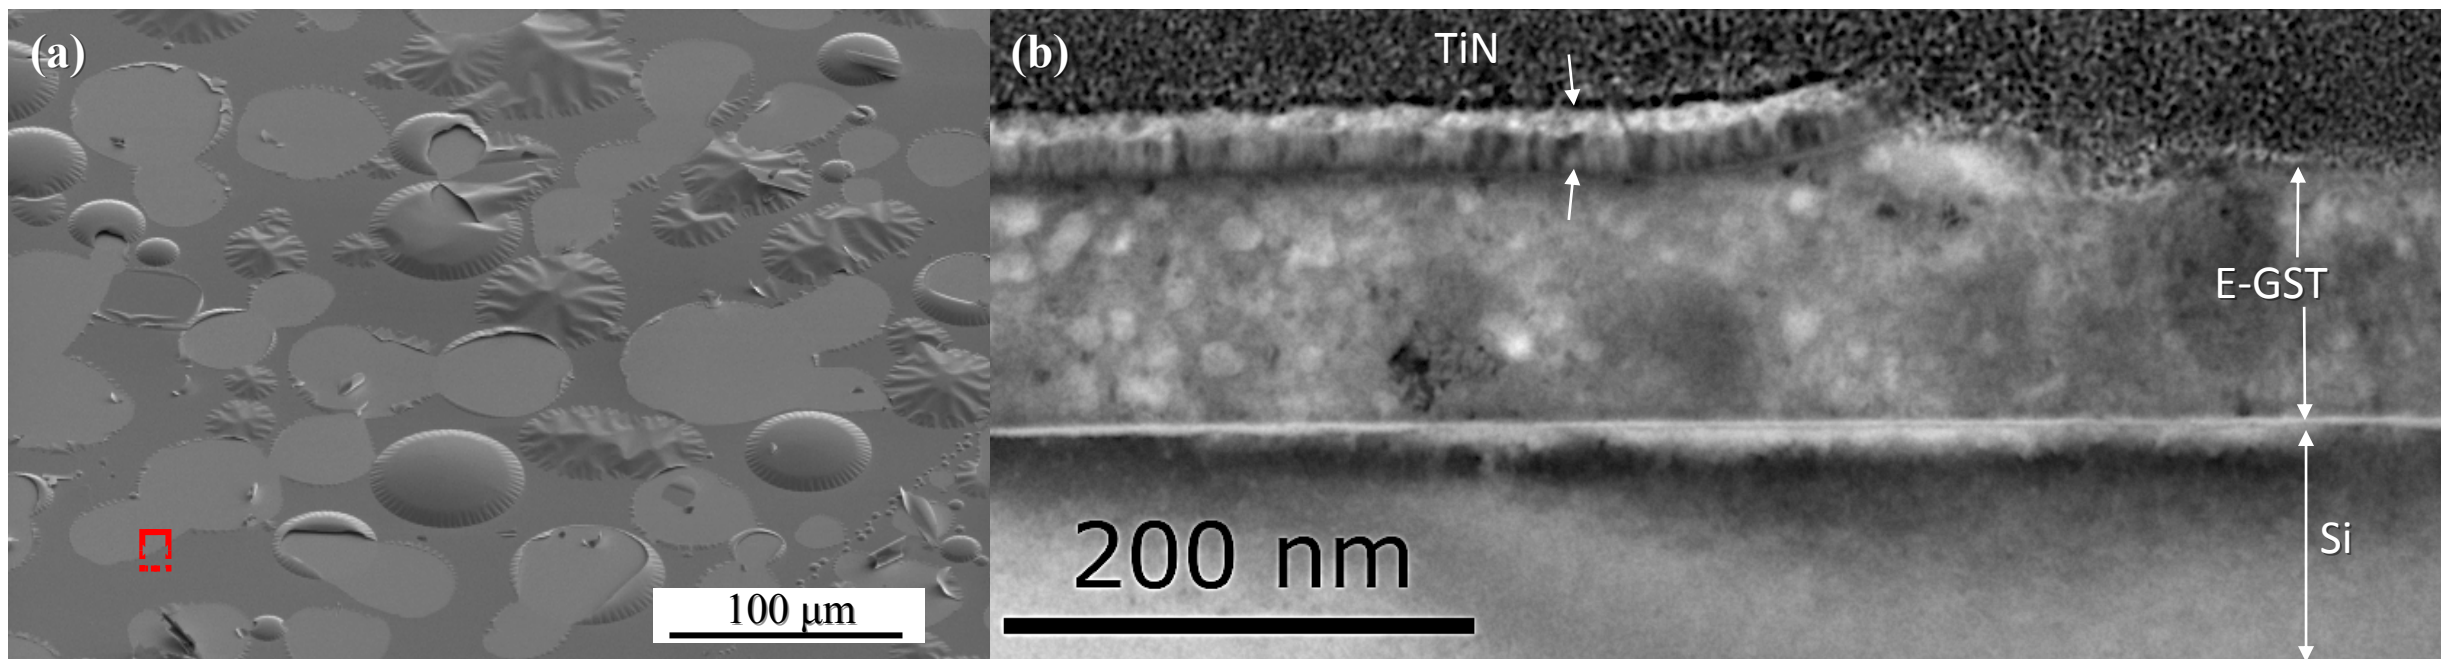

S1. (a) SEM image of the surface of E-GST annealed at 450°C for 30 minutes. (b) BT-TEM on FIB lamella cut in correspondence of a blister's edge, as shown by the red square in (a).
